# Supplementary material for: One RNA plays three roles to provide catalytic activity to a group I intron lacking an endogenous internal guide sequence
Source: PubMed Central journal article supplement — Nucleic Acids Res. 2009 Apr 30;37(12):3981–9. doi: 10.1093/nar/gkp271 (PMC2709566; doi:10.1093/nar/gkp271), 2009-04-30

**One RNA plays three roles to provide catalytic activity to a group I intron  
lacking an endogenous internal guide sequence**

Nilesh Vaidya and Niles Lehman

**Supplementary Figure S1.** *Trans*-splicing assays of the IGS-less ribozyme **V•X•Y•Z**. In these reactions, 5'-end-labeled **V•X•Y•Z** was incubated with three versions of the **h•Z** fragment, which behaves both as a substrate for *trans*-splicing and also provides an exogenous IGS sequence to the ribozyme in *trans*. Reactions were run for the times indicated and then the products were electrophoresed through an 8% polyacrylamide / 8 M urea gel. Mutations of the IGS sequence from GUG to CUG at locations ④ and/or ⑤ (Fig. 1A) greatly diminish *trans*-splicing activity (to 35% and 22%, respectively, of the activity seen in the unmutated construct after 2 hr).

**Supplementary Figure S2.** Analysis of splice-site specificity during covalent self-assembly in the absence of a canonical internal guide sequence. In these reactions, the 5' end of the head portion of the **h•Z** fragment was radiolabeled and reacted with the IGS-less fragment **V•X•Y** for the time indicated, and the products were electrophoresed through a 20% polyacrylamide / 8 M urea gel. Intermediates produced during covalent self-assembly of the product **V•X•Y•Z** and the remaining **h** fragment resulting from transesterification can be observed. If splicing occurs at the typical splice site following the CAU in the 5-nt head sequence (5'-GGCAU-3'), then a 5-nt product should result (indicated). Mis-splicing produces head fragments of varying lengths. The left-hand lanes on the gel depict results from self-assembly in which the **Y-Z** junction was designed to favor the two-step *R2F2* mechanism, while the right-hand lanes depict results from self-assembly in which the **Y-Z** junction was designed to favor the one-step *tF2* mechanism (19). Cloned RT-PCR **V•X•Y•Z** products from the *R2F2* reaction, if from a mis-splicing event, typically contained deletions of four nucleotides (see text), which would result in a nine-nucleotide head product ( $5 + 4 = 9$ ) as a result of splicing events four nucleotides downstream of the CAU, and these can be clearly seen on the gel. Cloned RT-PCR **V•X•Y•Z** products from the *tF2* reaction, if from a mis-splicing event, typically contained deletions of three or four nucleotides (see text), which would result in eight- or nine-nucleotide head products, seen on the gel.

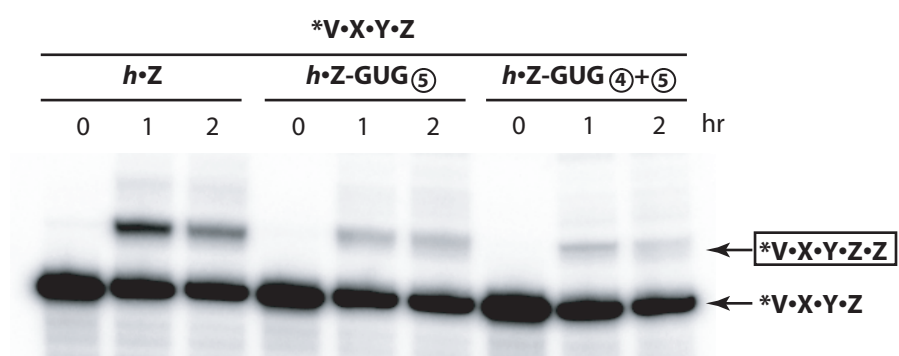

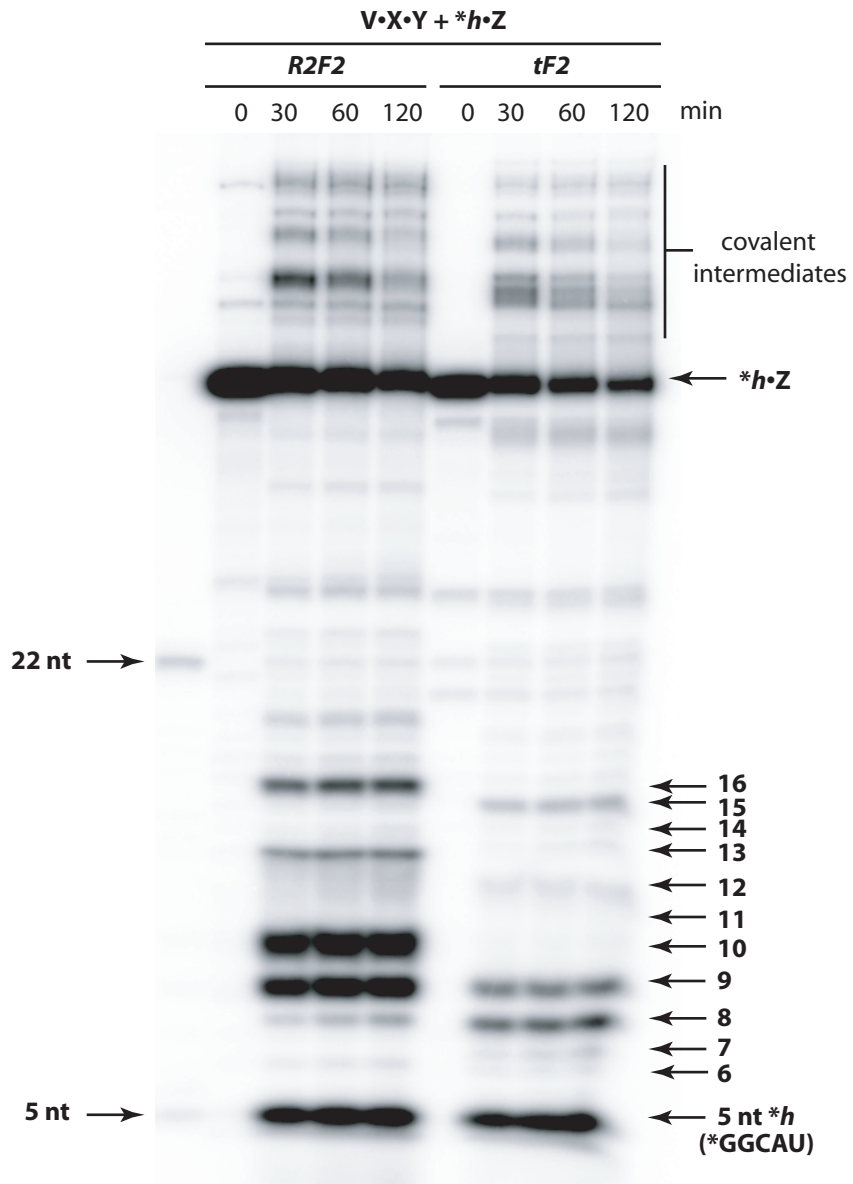

Supplement: gkp271_1.pdf [file gkp271_1.pdf]
